# Supplementary figures and images for: Diclofenac, a nonsteroidal anti‐inflammatory drug, is an antagonist of human TRPM3 isoforms
Source: PubMed Central journal article supplement — Pharmacol Res Perspect. 2016 Apr 7;4(3):e00232. doi: 10.1002/prp2.232 (PMC4876142; doi:10.1002/prp2.232), 2016-04-07

Fig.S1

A

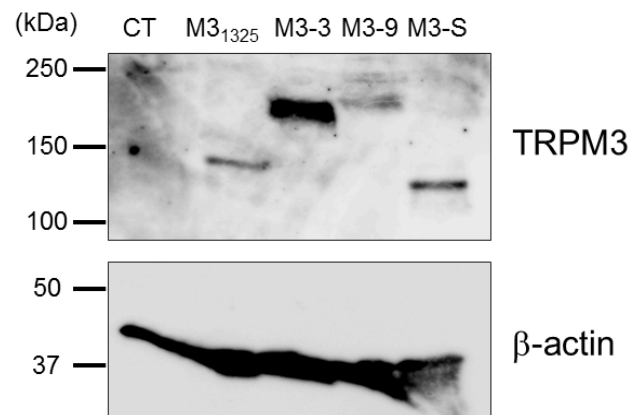

B

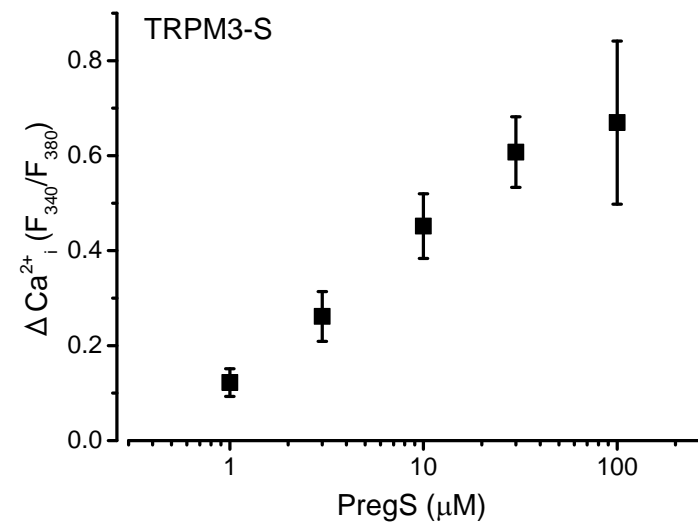

Fig.S2

A

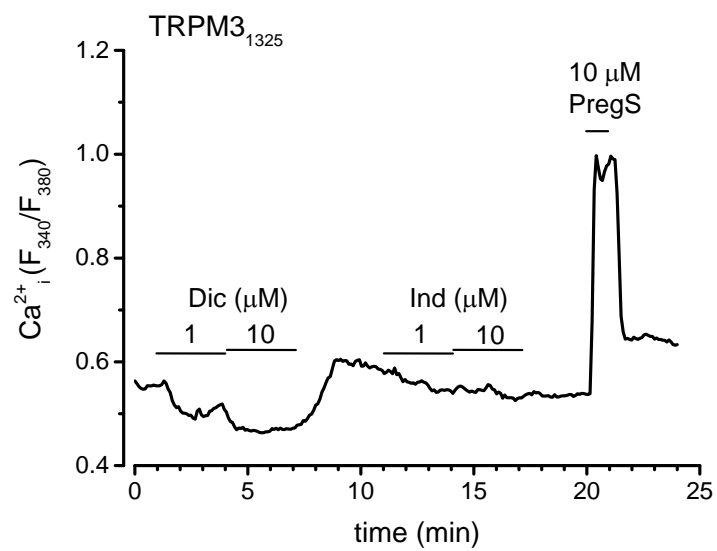

B

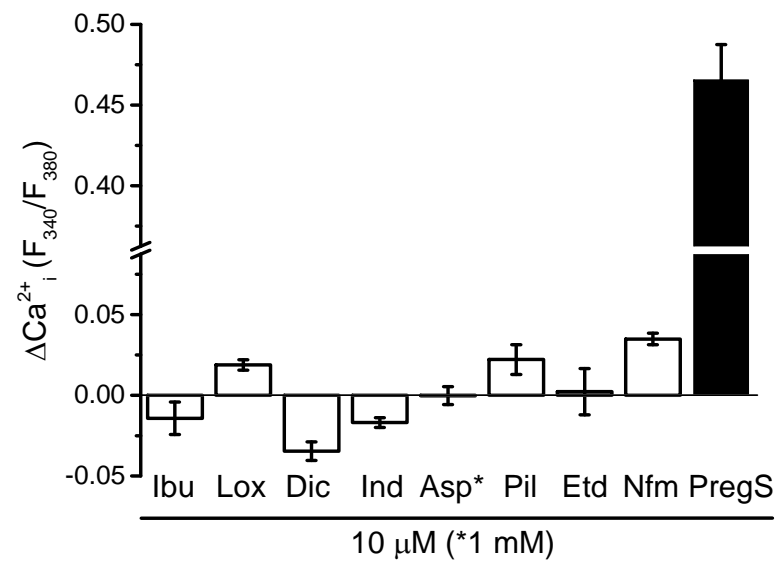

Fig.S3

A

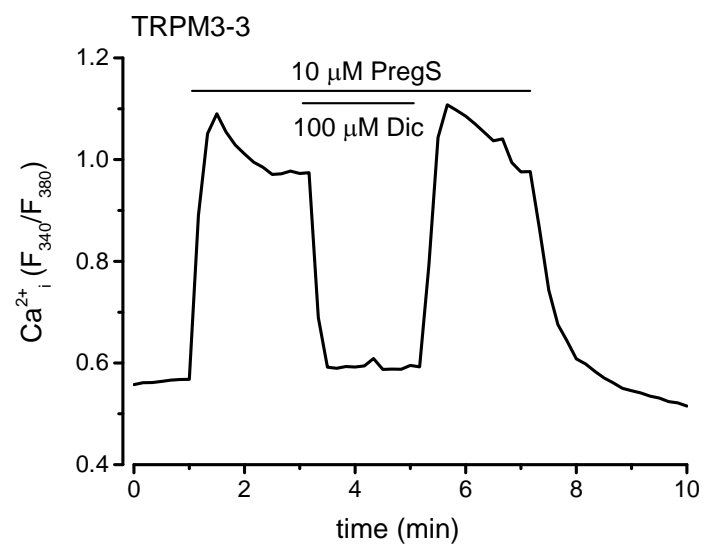

B

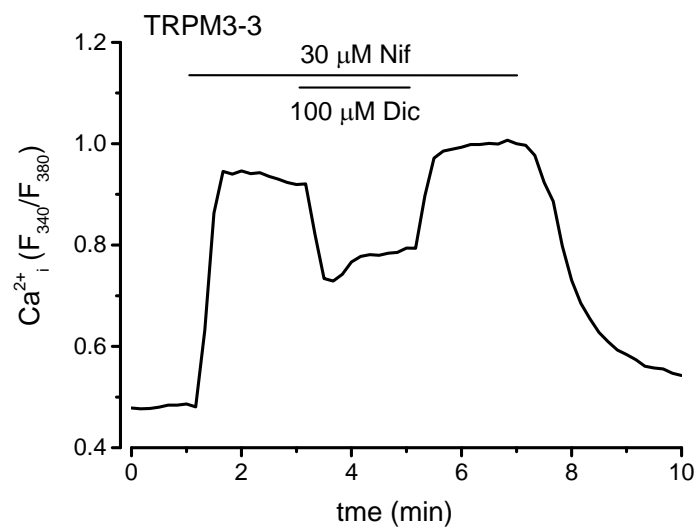

C

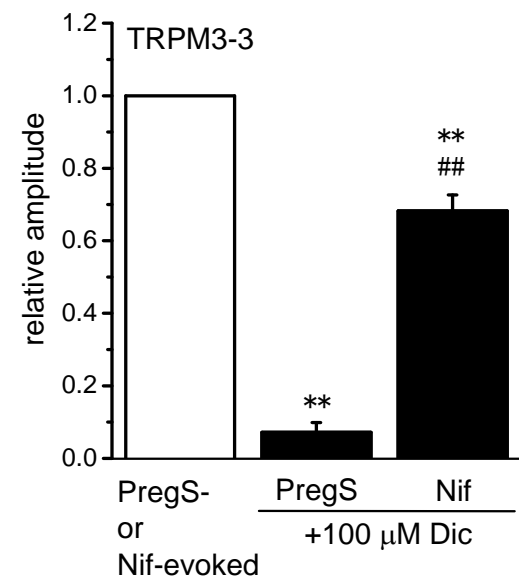

Supplement: PRP2-4-e00232-s001.pdf [file PRP2-4-e00232-s001.pdf]
